# Supplementary material for: Complete Genome Sequence Analysis of Ralstonia solanacearum Strain PeaFJ1 Provides Insights Into Its Strong Virulence in Peanut Plants
Source: Front Microbiol. 2022 Feb 23;13:830900. doi: 10.3389/fmicb.2022.830900 (PMC8904134; doi:10.3389/fmicb.2022.830900)
Supplement: Supplementary Table 8 — TCS prediction results in R. solanacearum PeaFJ1. [file Table_8.XLS]

## Sheet: Sheet1
Table S8 TCS prediction results in R.solanacearum PeaFJ1
Location	GeneID_HK	Transmembrane_Helix	HisKA	HATPase_c	GeneID_RR	Response_reg
Chromosome	JNO62_00175	15-37;150-172	226-291	336-445	JNO62_00170	3-113
	JNO62_00225	21-43	261-326	370-479	JNO62_00230	3-113
	JNO62_01115	7-29;214-231;238-257;267-286;295-317;327-349;356-375;385-404	-	548-640	JNO62_01110	15-127
	JNO62_01605	10-32;135-157	207-272	318-428	JNO62_01600	10-119
	JNO62_02295	15-37;173-195	247-312	360-485	JNO62_02300	3-113
	JNO62_03085	53-70;85-107;120-142;152-174;187-209	427-501	550-657	JNO62_03090	11-121
	JNO62_07455	4-26;28-50	206-272	316-427	JNO62_07450	5-117
	JNO62_07870	75-97	628-698	740-855	JNO62_07865	15-126
	JNO62_08125	12-34	240-299	337-450	JNO62_08130	8-118
	JNO62_08330	10-31;165-187	241-306	351-465	JNO62_08335	3-113
	JNO62_09845	38-60;70-92;101-120	143-224	237-333	JNO62_09840	7-122
	JNO62_09945	54-76;343-365	435-503	545-653	JNO62_09940	9-119
	JNO62_10340		176-240	281-400	JNO62_10335	4-114
	JNO62_14595	51-73;201-223	278-342	389-505	JNO62_14590	3-116
	JNO62_15750	44-66;339-361	432-498	542-657	JNO62_15745	7-117
	JNO62_17105	10-32;52-71;86-108;345-367	569-640	685-805	JNO62_17100	4-115
	JNO62_17295	21-43;48-67;80-102;112-134;155-177	-	312-430	JNO62_17290	7-128
	JNO62_17345	5-27;185-207	257-320	371-485	JNO62_17350	6-115
	JNO62_17405	7-26;203-225	249-327	372-465	JNO62_17410	7-119
Megaplasmid	JNO62_18390	13-35;171-193	436-504	542-636	JNO62_18395	5-117
	JNO62_18715	7-29;165-187	243-309	355-465	JNO62_18710	3-112
	JNO62_19340	7-29;205-227	277-341	390-501	JNO62_19335	2-111
	JNO62_19500	10-32;142-164	217-275	312-424	JNO62_19505	6-116
	JNO62_20430		-	411-550	JNO62_20435	6-121
	JNO62_20595	7-29	306-373	421-532	JNO62_20600	3-113
	JNO62_20655	13-35;45-67	123-186	232-355	JNO62_20660	4-113
	JNO62_21135	7-29	215-280	326-435	JNO62_21140	3-122
	JNO62_21825	21-43;315-337	406-474	516-630	JNO62_21830	19-129
	JNO62_23130	19-41;56-78	135-198	242-352	JNO62_23125	29-138
	JNO62_23900	13-35;172-191	246-312	355-465	JNO62_23905	3-112
	JNO62_24065	15-37;168-190	244-309	358-470	JNO62_24060	4-114
	JNO62_24650	12-34;160-182	238-304	347-458	JNO62_24655	3-113
